# Supplementary material
Source: HighWire-hosted journal article supplement (https://gut.bmj.com/highwire/filestream/193032/field_highwire_adjunct_files/1/Tsilingiri_et._al._Sup._Fig._1.pdf)
Supplement: Tsilingiri_et._al._Sup._Fig._1.pdf [file Tsilingiri_et._al._Sup._Fig._1.pdf]

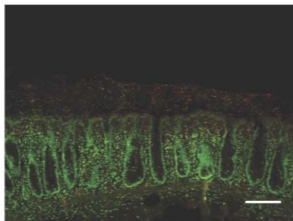

24 hours

Supplementary Fig. 1: Fluorescence In Situ Hybridization on a sample transferred in bacteriostatics but cultured overnight in their absence. Red: probe, green: DAPI staining, scale bar: 200 $\mu$ m.

Tsilingiri et. al. Suppl. Fig. 1
